# Supplementary material for: Spatial control of translation repression and polarized growth by conserved NDR kinase Orb6 and RNA-binding protein Sts5
Source: eLife. 2016 Jul 30;5:e14216. doi: 10.7554/eLife.14216 (PMC5011436; doi:10.7554/eLife.14216)
Supplement: Figure 3—source data 1. — A complete list of mRNAs detected at higher levels (≥1.9 fold) in sts5∆ cells by microarray analysis. DOI: http://dx.doi.org/10.7554/eLife.14216.009 [file elife-14216-fig3-data1.xlsx]

## Sheet: Sheet1
Figure 3—Source Data 1. Microarray Analysis.
Gene symbol	Systematic ID	Ratio sts5∆/WT	Function
Cell polarity signaling
cmk2	SPAC23A1.06c	2.25756	MAPK-activated protein kinase
lkh1	SPAC1D4.11c	2.15497	dual specificity protein kinase
ssp1	SPCC297.03	2.13408	Ca2+/calmodulin-dependent (CaMMK)-like protein kinase
efc25	SPBC336.03	2.02417	Ras1 guanyl-nucleotide exchange factor
spa2	SPAC3G9.05	2.0128	cell polarity protein
tea5	SPAC12B10.14c	1.95246	pseudokinase
ksg1	SPCC576.15c	1.9432	serine/threonine protein kinase
Adhesion/cell-surface glycoprotein
fta5	SPAC1F8.06	6.91048	cell surface glycoprotein
pfl6	SPAC977.07c	5.16847	cell surface glycoprotein, adhesion molecule
pfl9	SPAC186.01	3.60016	cell surface glycoprotein (predicted), DIPSY family
pfl4	SPCC188.09c	3.45916	cell surface glycoprotein, adhesion molecule (predicted)
Unassigned	SPAPB18E9.04c	2.17328	possible cell surface glycoprotein
SPBPJ4664.02	SPBPJ4664.02	2.14122	cell surface glycoprotein, flocculin, related to Gsf2
pfl5	SPBC1289.15	1.91208	cell surface glycoprotein (predicted)
Cell wall
psu1	SPAC1002.13c	2.61364	beta-glucosidase (predicted)
mok12	SPBC32H8.13c	2.28426	alpha-1,3-glucan synthase
asl1	SPAC13G6.10c	2.23719	O-glucosyl hydrolase (predicted)
SPBP23A10.11c	SPBP23A10.11c	2.17009	circularly permuted 1,3-beta-glucanase (predicted)
bgs2	SPAC24C9.07c	2.00254	1,3-beta-glucan synthase subunit
psu2	SPBC2G2.17c	1.97692	beta-glucosidase (predicted)
Transmembrane transport
ght5	SPCC1235.14	3.53382	hexose transmembrane transporter
SPBPB2B2.01	SPBPB2B2.01	2.90719	amino acid transmembrane transporter (predicted)
SPBC36.02c	SPBC36.02c	2.4481	spermidine family transporter (predicted)
SPBC1652.02	SPBC1652.02	2.39339	APC amino acid transporter
SPAC1B3.15c	SPAC1B3.15c	2.29698	vitamin H transmembrane transporter (predicted)
SPAC23D3.12	SPAC23D3.12	2.24601	inorganic phosphate transporter (predicted)
SPAC1002.16c	SPAC1002.16c	2.24224	nicotinic acid plasma membrane transporter (predicted)
thi9	SPAC9.10	2.19541	thiamine transmembrane transporter
SPBC1683.01	SPBC1683.01	2.14781	inorganic phosphate transmembrane transporter (predicted)
mam1	SPBC25B2.02c	2.05959	M-factor transmembrane transporter
mpc2	SPAC24B11.09	2.01012	mitochondrial pyruvate transmembrane transporter
pho84	SPBP4G3.01	2.00866	inorganic phosphate transmembrane transporter (predicted)
fur4	SPAC1399.03	2.00026	uracil permease
dal51	SPCC417.10	1.98636	dipeptide transmembrane transporter (predicted)
mug86	SPAC5D6.09c	1.97713	acetate transmembrane transporter
atm1	SPAC15A10.01	1.96976	mitochondrial ABC family iron transmembrane transporter
SPCC584.13	SPCC584.13	1.96782	amino acid permease
pmc1	SPAPB2B4.04c	1.95873	vacuolar calcium transporting P-type ATPase P2 type
SPCC2H8.02	SPCC2H8.02	1.94337	inorganic phosphate transmembrane transporter (predicted)
SPBC409.08	SPBC409.08	1.93559	spermine family transmembrane transporter (predicted)
SPAC1039.01	SPAC1039.01	1.93219	amino acid permease (predicted)
SPCC965.13	SPCC965.13	1.91996	pyridoxal family transmembrane transporter (predicted)
SPCC74.04	SPCC74.04	1.91763	amino acid permease (predicted)
Transcription factors
mbx2	SPBC317.01	2.95983	MADS-box transcription factor
scr1	SPBC1D7.02c	2.26974	transcription factor
SPAC2H10.01	SPAC2H10.01	2.04825	transcription factor, zf-fungal binuclear cluster type (predicted)
SPCC417.09c	SPCC417.09c	2.03845	transcription factor (predicted)
pho7	SPBC27B12.11c	1.97305	transcription factor
mbx1	SPBC19G7.06	1.96244	MADS-box transcription factor1
SPBC16G5.17	SPBC16G5.17	1.91502	transcription factor, zf-fungal binuclear cluster type (predicted)
rep1	SPBC2D10.06	1.91315	MBF transcription factor activator
Mating/flocculation
mat1-Mc	SPBC23G7.09	35.1934	mating-type m-specific polypeptide Mc
mfm2	SPAC513.03	9.79173	M-factor precursor
gsf2	SPCC1742.01	7.56197	galactose-specific flocculin
rgs1	SPAC22F3.12c	2.79797	regulator of G-protein signaling
mam2	SPAC11H11.04	2.08814	pheromone p-factor receptor
SPBPJ4664.02	SPBPJ4664.02	2.14122	cell surface glycoprotein, flocculin, related to Gsf2
msa1	SPAC13G7.13c	2.08069	RNA-binding protein
Meiosis
mug14	SPBC359.06	4.99089	adducin
mei2	SPAC27D7.03c	2.95742	RNA-binding protein involved in meiosis
pat1	SPBC19C2.05	2.41531	serine/threonine protein kinase
mug8	SPAC32A11.01	2.34394	conserved fungal protein
spo7	SPAC6G9.04	2.25211	sporulation protein
dbl2	SPCC553.01c	2.09786	meiotic chromosome segregation protein
mug72	SPCC1902.02	2.01951	oxidoreductase (predicted)
npg1	SPBC17D1.07c	2.05301	GTPase regulator Rng2-like (predicted)
pit1	SPAC3C7.06c	1.9438	serine/threonine protein kinase, meiotic
mei4	SPBC32H8.11	1.93439	meiotic forkhead transcription factor
spc7	SPCC1020.02	1.9121	NMS complex subunit, Spc105/KNL-1 family member, blinkin
RNA binding
scw1	SPCC16C4.07	2.08585	RNA-binding protein
mei2	SPAC27D7.03c	2.95742	RNA-binding protein involved in meiosis
pus3	SPCC16C4.06c	2.13246	tRNA pseudouridylate synthase (predicted)
msa1	SPAC13G7.13c	2.08069	RNA-binding protein
seb1	SPAC222.09	1.99549	RNA-binding protein
spb1	SPAC1687.11	1.96013	rRNA methyltransferase (predicted)
trz2	SPBC3D6.03c	1.94413	mitochondrial 3'-tRNA processing endonuclease tRNAse Z
Cytokinesis/septation
sfi1	SPBC8D2.05c	2.00371	spindle pole body protein
art1	SPBC19G7.08c	2.08992	arrestin family protein
scw1	SPCC16C4.07	2.08585	RNA-binding protein
chr4	SPBC1289.01c	1.98318	1,3-beta-glucan synthase regulatory factor
Cytosekeleton organization
gyp3	SPCC4G3.09c	2.48899	GTPase activating protein
nsk1	SPAC3G9.01	2.29584	Clp1-interacting, microtubule plus-end binding
dis1	SPCC736.14	2.2173	TOG/XMAP14 microtubule-associated protein
mmb1	SPBC25B2.07c	2.17104	mitochondrial microtubule binder
cut11	SPAC1786.03	1.9592	spindle pole body docking protein
alp16	SPCC4G3.19	1.91193	gamma tubulin complex subunit
Lipid metabolic process
hmg1	SPCC162.09c	2.09589	3-hydroxy-3-methylglutaryl-CoA reductase
SPAC1786.02	SPAC1786.02	2.06723	phospholipase (predicted)
ptl1	SPCC1450.16c	2.02727	triacylglycerol lipase
eki1	SPAC13G7.12c	1.97272	choline/ethanolamine kinase (predicted)
gpi7	SPAC13G6.03	1.92199	GPI anchor biosynthesis protein (predicted)
Telomere maintenance/organization
tlh2	SPBCPT2R1.08c	39.745	RecQ type DNA helicase
tlh1	SPAC212.11	11.0774	RecQ type DNA helicase
rif1	SPAC6F6.17	2.17366	telomere length regulator protein
tel1	SPCC23B6.03c	2.0894	ATM checkpoint kinase
Carbohydrate metabolic process
inv1	SPCC191.11	4.60016	external invertase, beta-fructofuranosidase
agl1	SPAPB24D3.10c	2.46881	maltose alpha-glucosidase
gal7	SPBPB2B2.10c	2.1593	galactose-1-phosphate uridylyltransferase
gld1	SPAC13F5.03c	2.03345	mitochondrial glycerol dehydrogenase
pvg2	SPAC27E2.07	1.95309	galactose residue biosynthesis protein
pfk1	SPBC16H5.02	1.92908	6-phosphofructokinase
Vesicle-mediated transport
dph7	SPCC18.15	2.74895	WD repeat protein, involved in diphthamide biosynthesis (predicted)
vps1301	SPBC21C3.01c	2.36328	chorein homolog
cog1	SPAC144.15c	1.93219	Golgi transport complex subunit (predicted)
sec5	SPCC622.10c	1.92391	exocyst complex subunit (predicted)
Chromatin remodeling/organization
clr5	SPAC29B12.08	2.47724	silencing factor
tra2	SPAC1F5.11c	2.30596	NuA4 complex phosphatidylinositol pseudokinase complex subunit
abo2	SPBP22H7.05c	2.20267	ATPase with bromodomain protein (predicted)
mit1	SPBP35G2.10	2.07806	SHREC complex ATP-dependent DNA helicase subunit
ima1	SPCC737.03c	2.07617	inner nuclear membrane protein
mug165	SPAC5D6.02c	2.01561	Clr6 histone deacetylase complex subunit
chp1	SPAC18G6.02c	1.92062	chromodomain protein
DNA repair
rad3	SPBC216.05	2.50355	ATR checkpoint kinase
rhp42	SPCC4G3.10c	2.17392	DNA repair protein
fan1	SPBC146.06c	2.08188	Fanconi-associated nuclease
rad54	SPAC15A10.03c	2.05193	DNA-dependent ATPase
Phosphatase
ibp1	SPBC839.07	2.43405	Cdc25 family phosphatase
SPAC1039.02	SPAC1039.02	2.29303	phosphoprotein phosphatase (predicted)
pmp1	SPBC1685.01	2.12485	dual-specificity MAP kinase phosphatase
pho4	SPBC428.03c	2.04062	thiamine-repressible acid phosphatase
SPBPB2B2.06c	SPBPB2B2.06c	1.94502	phosphoprotein phosphatase (predicted)
Other
SPBC23G7.10c	SPBC23G7.10c	7.25293	NADH-dependent flavin oxidoreductase (predicted)
SPAC513.04	SPAC513.04	2.96847	Schizosaccharomyces pombe specific protein
pdi4	SPAC959.05c	2.74043	protein disulfide isomerase (predicted)
pof15	SPAPB1A10.14	2.38257	F-box protein (predicted)
ppk33	SPCC162.10	2.27065	serine/threonine protein kinase (predicted)
btb1	SPCC330.11	2.2684	BTB/POZ domain protein
SPAPB1A10.13	SPAPB1A10.13	2.19543	Schizosaccharomyces specific protein
SPBC1685.05	SPBC1685.05	2.12509	serine protease (predicted)
SPBC405.02c	SPBC405.02c	2.10476	Schizosaccharomyces specific protein
res1	SPBC725.16	2.08918	MBF transcription factor complex subunit
hem3	SPAC24B11.13	1.99087	hydroxymethylbilane synthase (predicted)
SPBC1652.01	SPBC1652.01	1.98871	ribosomal RNA processing element (RRPE)-binding protein (predicted)
SPBP19A11.02c	SPBP19A11.02c	1.97624	Schizosaccharomyces pombe specific protein, predicted GPI anchored
atd1	SPAC9E9.09c	1.97522	aldehyde dehydrogenase (predicted)
SPBP4H10.14c	SPBP4H10.14c	1.96977	Schizosaccharomyces specific protein
SPBC418.02	SPBC418.02	1.96915	NatA N-acetyltransferase complex subunit (predicted)
adl1	SPBC713.06	1.9463	DNA ligase (predicted)
nup85	SPBC17G9.04c	1.94312	nucleoporin
SPCC18B5.05c	SPCC18B5.05c	1.93646	phosphomethylpyrimidine kinase (predicted)
SPBC1271.15c	SPBC1271.15c	1.93117	mitochondrial translation initiation factor IF-2Mt (predicted)
SPAC11D3.14c	SPAC11D3.14c	1.91795	5-oxoprolinase (ATP-hydrolizing) (predicted)
sal3	SPCC1840.03	1.91131	karyopherin
nup124	SPAC30D11.04c	1.90525	nucleoporin
